# Supplementary material for: Simultaneous measurement stable and radiogenic Nd isotopic compositions by MC-ICP-MS with a single-step chromatographic extraction technique
Source: Royal Society of Chemistry journal article supplement (doi:10.1039/d1ja00302j), 2021-01-01
Supplement: d1ja00302j1.pdf [file d1ja00302j1.pdf]

Table S1 Comparison of stable Nd isotope analysis methods

| Separation methods                                                                          | Yield (%) | Residual Ce (%) | Instruments                                                    | External precision(‰) | References                                   |
|---------------------------------------------------------------------------------------------|-----------|-----------------|----------------------------------------------------------------|-----------------------|----------------------------------------------|
| One columns:<br>AG50W-X8 (100~200 mesh)                                                     |           |                 | TIMS + Double spike<br>( <sup>145</sup> Nd+ <sup>150</sup> Nd) | 0.030                 | Wakaki and Tanaka, 2012 <sup>1</sup>         |
| Two columns:<br>AG50W-X12 (200~400 mesh)+Ln (50~100µm)                                      | 98.3%     | 4.4%            | MC-ICP-MS                                                      | 0.050                 | Ma <i>et al.</i> (2013) <sup>2</sup>         |
| Three columns<br>AG50W-X8 (200~400 mesh)+TRU Spec<br>(50~100µm) +Ln(25~50µm)                | 95%       |                 | MC-ICP-MS+C-SSBIN                                              | 0.060                 | Ohno and Hirata, (2013) <sup>3</sup>         |
| Four columns:<br>AG50W-<br>X8(200~400mesh)+Ln(50~100µm)+Ln(25~50µm)+AG50W-X8 (200~400 mesh) |           | 1%              | MC-ICP-MS                                                      | 0.040                 | Saji <i>et al.</i> (2016) <sup>4</sup>       |
| Two columns:<br>AG50W-X8 (100~200 mesh)+Ln (50~100µm)                                       | 96.8%     | 6%              | TIMS + Double spike<br>( <sup>145</sup> Nd+ <sup>150</sup> Nd) | 0.017                 | McCoy-West <i>et al.</i> (2017) <sup>5</sup> |
| One column:<br>TODGA (TrisKem)                                                              | 99.2%     | 0.5%            | MC-ICP-MS                                                      | 0.030                 | Wang <i>et al.</i> (2017) <sup>6</sup>       |
| Three columns<br>TRU/Ln tandem+Ln/DGA tandem+DGA/Ln tandem                                  | 80~90%    |                 | TIMS                                                           | 0.006                 | Pin and Gannoun, (2019) <sup>7</sup>         |
| One column:<br>TODGA (Eichrom)                                                              | >99.5%    | 0.04%           | MC-ICP-MS+C-SSBIN<br>(Eu internal)                             | 0.030                 | This study                                   |

## References:

1. S. Wakaki and T. Tanaka, *Int J Mass Spectrom*, 2012, **323/324**, 45-54.
2. J. L. Ma, G. J. Wei, Y. Liu, Z. Y. Ren, Y. G. Xu and Y. H. Yang, *Journal of Analytical Atomic Spectrometry*, 2013, **28**, 1926-1931.
3. T. Ohno and T. Hirata *Analytical Sciences*, 2013, **29**, 47-53.
4. N. S. Saji, D. Wielandt, C. Paton and M. Bizzarro, *Journal of Analytical Atomic Spectrometry*, 2016, **31**, 1490-1504.
5. A. J. McCoy-West, M.-A. Millet and K. W. Burton, *Earth and Planetary Science Letters*, 2017, **480**, 121-132.
6. Y. Wang, X. Huang, Y. Sun, S. Zhao and Y. Yue, *Anal Methods-Uk*, 2017, **9**, 3531-3540.
7. C. Pin and A. Gannoun, *Journal of Analytical Atomic Spectrometry*, 2019, **34**, 310-318.
